# Supplementary material for: Synthesis of γ-valerolactone using a continuous-flow reactor
Source: Royal Society of Chemistry journal article supplement (doi:10.1039/c3ra43032d), 2013-01-01
Supplement: c3ra43032d.pdf [file c3ra43032d.pdf]

## Synthesis of $\gamma$ -valerolactone using a continuous-flow reactor

József M. Tukacs,<sup>a</sup> Richard V. Jones,<sup>b</sup> Ferenc Darvas,<sup>b</sup> Gábor Dibó,<sup>a</sup> Gábor Lezsák,<sup>a</sup>  
and László T. Mika<sup>\*,a,c</sup>

<sup>a</sup>Eötvös Loránd University, Institute of Chemistry, Pázmány Péter sétány 1/A, Budapest, H-1117, Hungary

<sup>b</sup>ThalesNano Nanotechnology Inc., H-1031, Budapest, Záhony u.7, Hungary

<sup>c</sup>Budapest University of Technology and Economics, Department of Chemical and Environmental Process Engineering, Budafoki str. 8, Budapest, Hungary, H-1111, Tel: +361463 1263 E-mail: [laszlo.t.mika@mail.bme.hu](mailto:laszlo.t.mika@mail.bme.hu)

### Electronic Supplementary Information (ESI)

Schematic representation of a continuous-flow reactor: H-Cube<sup>®</sup> (Ref: 1)

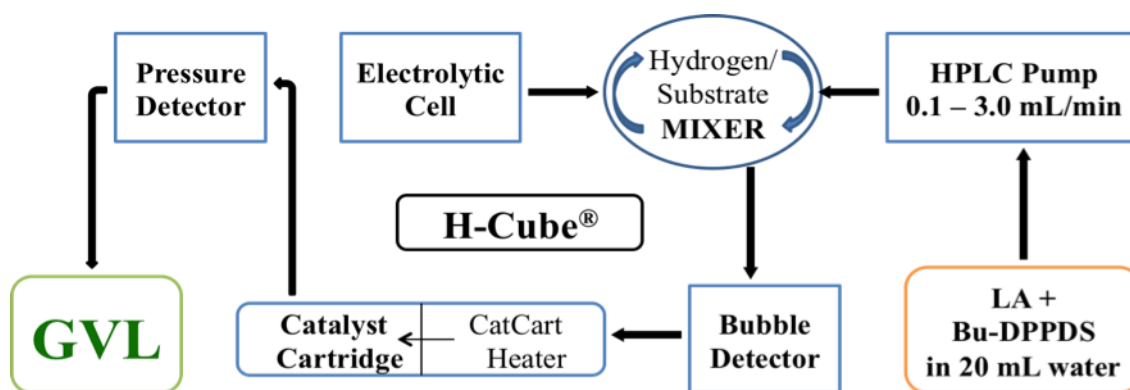

Figure S1. H-Cube<sup>®</sup> hydrogenation system

Table S1. H-Cube<sup>®</sup> and H-Cube Pro<sup>™</sup> reactors for scale-up

| Parameters/Advantages <sup>2</sup>     | H-Cube <sup>®</sup>                                                                                                                                                | H-Cube Pro <sup>™</sup> |
|----------------------------------------|--------------------------------------------------------------------------------------------------------------------------------------------------------------------|-------------------------|
| <b>Flow rate range</b>                 | 0.1–3.0 mL/min                                                                                                                                                     | 0.1–3.0 mL/min          |
| <b>Temperature range</b>               | 25–100 °C                                                                                                                                                          | 10–150 °C               |
| <b>Pressure range</b>                  | 1–100 bar                                                                                                                                                          | 1–100 bar               |
| <b>Concentration range</b>             | 0.01–0.1 M                                                                                                                                                         | 0.01–2 M                |
| <b>Capacity of hydrogen production</b> | 30 mL/min                                                                                                                                                          | 60 mL/min               |
| <b>Safety</b>                          | - no cylinders or other external hydrogen source necessary<br>- no catalyst filtration or direct catalyst handling<br>- easy catalystCatCart <sup>®</sup> exchange |                         |
| <b>Efficiency</b>                      | analysis of the reaction mixture after 5 min, pressure and temperature can then be adjusted to optimize product conversion to 100%                                 |                         |
| <b>Convenience</b>                     | compact size, fits in a standard laboratory fume hood                                                                                                              |                         |

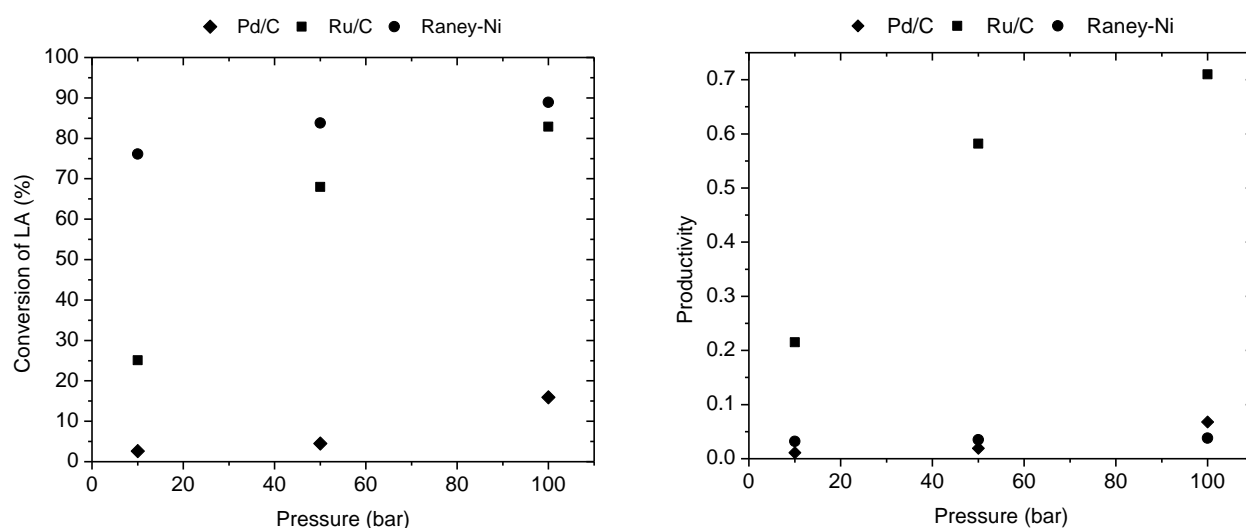

(a) Conversions of levulinic acid to  $\gamma$ -valerolactone in the presence of different catalysts using a flow rate of 1 mL/min at 100 °C. Initial levulinic acid concentration was 0.1 M.

(b) Productivities of the reduction of levulinic acid to  $\gamma$ -valerolactone in the presence of different catalysts using a flowrate of 1 mL/min at 100 °C. Initial levulinic acid concentration was 0.1 M.

Figure S2.

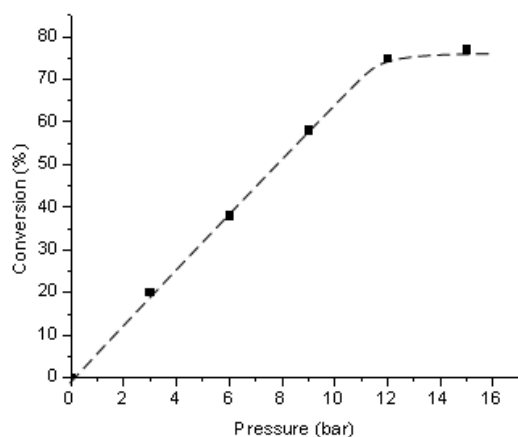

Figure S3. The effect of system pressure on the conversion of LA to GVL  
 The data are adopted from the paper published by Z. Yan, L. Lin and S. Liu, *Energy & Fuels*, 2009, **23**, 3853.

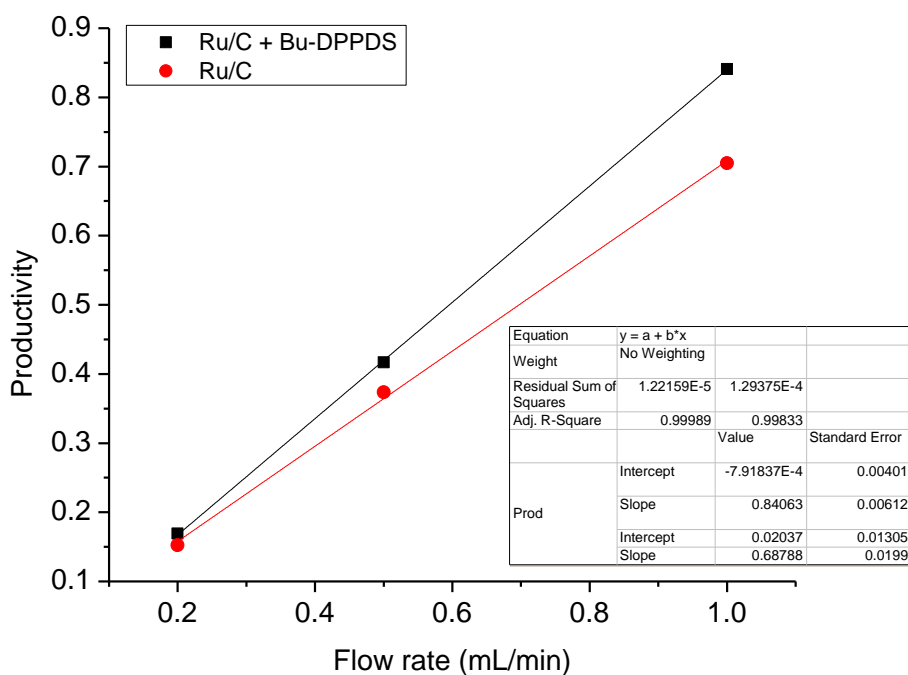

| Flow rate ml/min | Prod. Ru/C + Bu-DPPDS | Prod. Ru/C |
|------------------|-----------------------|------------|
| 0.2              | 0.1691                | 0.1522     |
| 0.5              | 0.4167                | 0.3735     |
| 1                | 0.8409                | 0.7048     |

Figure S4. Productivities of GVL as the function of flow rate.

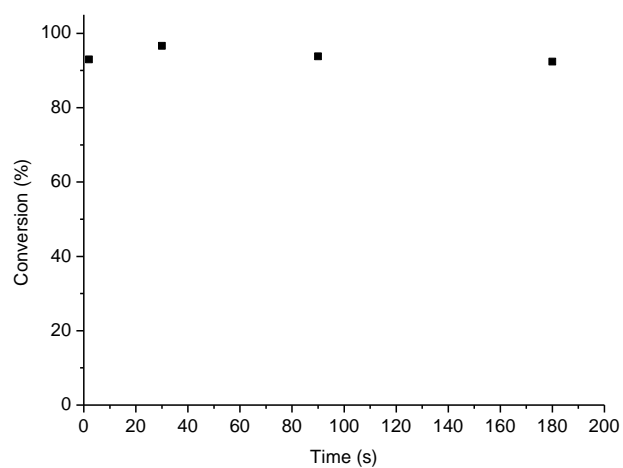

Figure S5. Conversion of LA to GVL.

Conversion of LA to GVL using 5% Ru/C as a catalyst. The selectivity was higher than 99%.

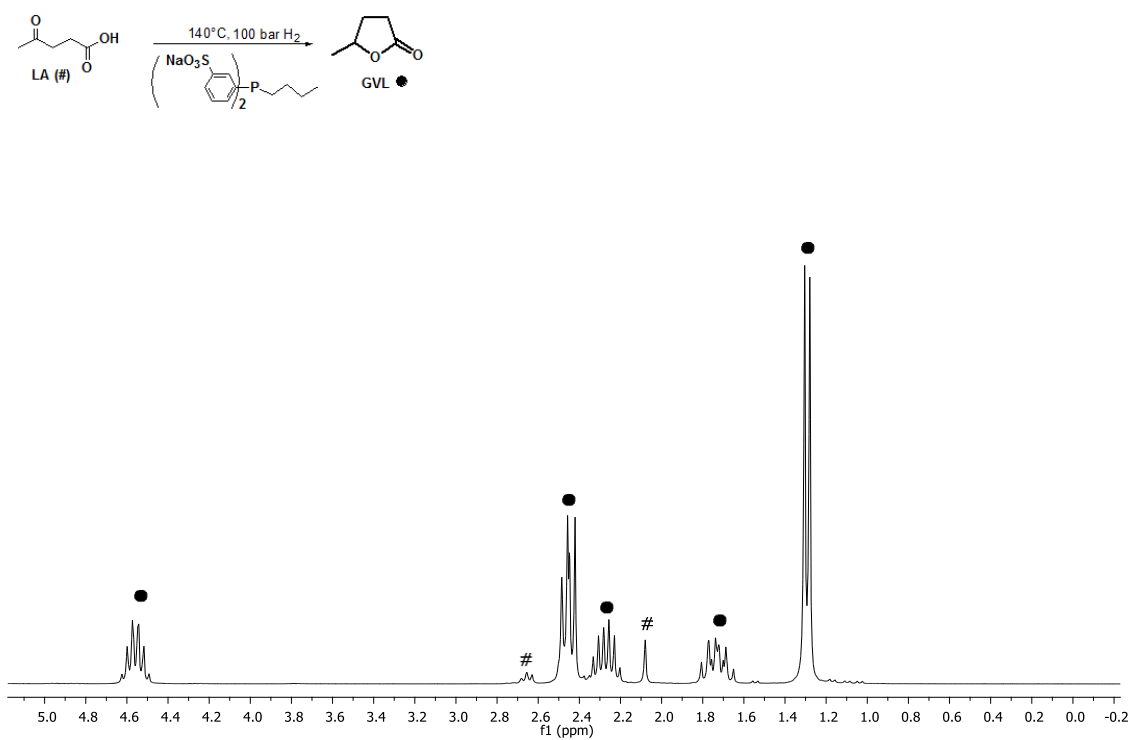

Figure S6. <sup>1</sup>H-NMR spectrum of the reaction mixture

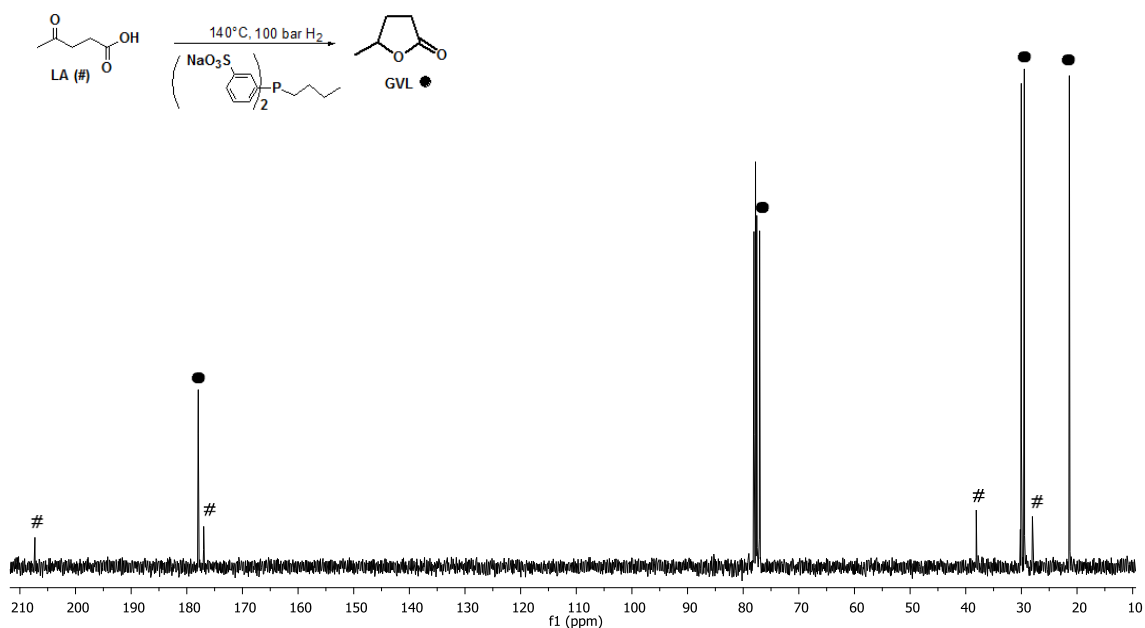

Figure S7. <sup>13</sup>C-NMR (in CDCl<sub>3</sub>) spectrum of the reaction mixture

Table S2. Synthesis of  $\gamma$ -valerolactone using H-Cube<sup>®</sup> as a continuous-flow reactor system (effect of the flow rate on the conversion) in 20 mL of water under 100 bar of hydrogen at 100 °C

| Entry | Catalyst | [ Bu-DPPDS]<br>(mmol/L) | v<br>(mL/min) | Conv.<br>(%) | Productivity<br>(mol <sub>GVL</sub> × g <sub>Metal</sub> <sup>-1</sup> × h <sup>-1</sup> ) |
|-------|----------|-------------------------|---------------|--------------|--------------------------------------------------------------------------------------------|
| 1     | 5% Ru/C  | -                       | <b>0.2</b>    | <b>88.8</b>  | 0.152                                                                                      |
| 2     | 5% Ru/C  | -                       | <b>0.5</b>    | <b>87.2</b>  | 0.373                                                                                      |
| 3     | 5% Ru/C  | -                       | <b>1.0</b>    | <b>82.2</b>  | 0.704                                                                                      |
| 4     | 5% Ru/C  | -                       | <b>1.5</b>    | <b>71.3</b>  | 0.916                                                                                      |
| 5     | 5% Ru/C  | -                       | <b>2.0</b>    | <b>60.9</b>  | 1.044                                                                                      |
| 6     | 5% Ru/C  | 15                      | <b>0.2</b>    | <b>98.6</b>  | 0.169                                                                                      |
| 7     | 5% Ru/C  | 15                      | <b>0.5</b>    | <b>97.2</b>  | 0.416                                                                                      |
| 8     | 5% Ru/C  | 15                      | <b>1.0</b>    | <b>98.1</b>  | 0.840                                                                                      |
| 9     | 5% Ru/C  | 15                      | <b>1.5</b>    | <b>77.2</b>  | 0.992                                                                                      |
| 10    | 5% Ru/C  | 15                      | <b>2.0</b>    | <b>65.9</b>  | 1.129                                                                                      |
| 11    | 5% Ru/C  | 0.15                    | <b>1.0</b>    | <b>95.6</b>  | 0.819                                                                                      |
| 12    | 5% Ru/C  | 1.5                     | <b>1.0</b>    | <b>98.3</b>  | 0.842                                                                                      |
| 13    | 5% Ru/C  | 15                      | <b>1.0</b>    | <b>98.5</b>  | 0.844                                                                                      |
| 14    | Raney-Ni | -                       | <b>0.5</b>    | <b>92.2</b>  | 0.019                                                                                      |
| 15    | Raney-Ni | -                       | <b>1.0</b>    | <b>88.2</b>  | 0.037                                                                                      |
| 16    | Raney-Ni | -                       | <b>1.5</b>    | <b>80.1</b>  | 0.051                                                                                      |
| 17    | Raney-Ni | -                       | <b>2.0</b>    | <b>66.0</b>  | 0.056                                                                                      |

Table S3. Synthesis of  $\gamma$ -valerolactone using H-Cube<sup>®</sup> as a continuous-flow reactor system (effect of the pressure on the conversion) in 20 mL of water with a flow rate of 1 mL/min at 100 °C

| Entry | Catalyst | [ Bu-DPPDS]<br>(mol/L) | <b>p</b><br>(bar) | <b>Conv.</b><br>(%) | Productivity<br>(mol <sub>GVL</sub> ×g <sub>Metal</sub> <sup>-1</sup> ×h <sup>-1</sup> ) |
|-------|----------|------------------------|-------------------|---------------------|------------------------------------------------------------------------------------------|
| 1     | 10% Pd/C | -                      | <b>10</b>         | <b>2.6</b>          | 0.011                                                                                    |
| 2     | 10% Pd/C | -                      | <b>50</b>         | <b>4.5</b>          | 0.019                                                                                    |
| 3     | 10% Pd/C | -                      | <b>100</b>        | <b>15.9</b>         | 0.068                                                                                    |
| 4     | 10% Pd/C | 0.15                   | <b>10</b>         | <b>3.9</b>          | 0.016                                                                                    |
| 5     | 10% Pd/C | 0.15                   | <b>50</b>         | <b>7.7</b>          | 0.033                                                                                    |
| 6     | 10% Pd/C | 0.15                   | <b>100</b>        | <b>16.3</b>         | 0.069                                                                                    |
| 7     | 5% Ru/C  | -                      | <b>10</b>         | <b>25.1</b>         | 0.215                                                                                    |
| 8     | 5% Ru/C  | -                      | <b>50</b>         | <b>68.0</b>         | 0.582                                                                                    |
| 9     | 5% Ru/C  | -                      | <b>100</b>        | <b>82.9</b>         | 0.710                                                                                    |
| 10    | 5% Ru/C  | 0.15                   | <b>10</b>         | <b>39.4</b>         | 0.337                                                                                    |
| 11    | 5% Ru/C  | 0.15                   | <b>50</b>         | <b>71.8</b>         | 0.615                                                                                    |
| 12    | 5% Ru/C  | 0.15                   | <b>100</b>        | <b>95.3</b>         | 0.816                                                                                    |
| 13    | Raney-Ni | -                      | <b>10</b>         | <b>76.1</b>         | 0.032                                                                                    |
| 14    | Raney-Ni | -                      | <b>50</b>         | <b>83.3</b>         | 0.035                                                                                    |
| 15    | Raney-Ni | -                      | <b>100</b>        | <b>88.9</b>         | 0.038                                                                                    |

Table S4. Synthesis of  $\gamma$ -valerolactone using H-Cube Pro<sup>™</sup> as a continuous-flow reactor system (effect of the pressure on the conversion) in 20 mL of water with a flow rate of 1 mL/min at 140 °C

| Entry | Catalyst | [ Bu-DPPDS]<br>(mol/L) | <b>p</b><br>(bar) | <b>Conv.</b><br>(%) | Productivity<br>(mol <sub>GVL</sub> ×g <sub>Metal</sub> <sup>-1</sup> ×h <sup>-1</sup> ) |
|-------|----------|------------------------|-------------------|---------------------|------------------------------------------------------------------------------------------|
| 1     | 10% Pd/C | -                      | <b>10</b>         | <b>18.5</b>         | 0.079                                                                                    |
| 2     | 10% Pd/C | -                      | <b>50</b>         | <b>37.7</b>         | 0.161                                                                                    |
| 3     | 10% Pd/C | -                      | <b>100</b>        | <b>44.5</b>         | 0.190                                                                                    |
| 4     | 10% Pd/C | 0.15                   | <b>10</b>         | <b>30.9</b>         | 0.132                                                                                    |
| 5     | 10% Pd/C | 0.15                   | <b>50</b>         | <b>45.6</b>         | 0.195                                                                                    |
| 6     | 10% Pd/C | 0.15                   | <b>100</b>        | <b>51.2</b>         | 0.219                                                                                    |
| 7     | 5% Ru/C  | -                      | <b>10</b>         | <b>97.1</b>         | 0.832                                                                                    |
| 8     | 5% Ru/C  | 0.15                   | <b>50</b>         | <b>98.6</b>         | 0.845                                                                                    |

### Synthesis of butyldiphenylphosphane<sup>3</sup>

11.5 g (124.6 mmol) butyl chloride in 100 mL diethyl ether was added dropwise to 3.34 g (137.1 mmol) magnesium metal pre-activated with a few crystals of iodine, then cooled to 0–5°C and kept under nitrogen. To this solution, 25 g chlorodiphenylphosphane (113.3 mmol) in 100 mL diethyl ether was added through a dropping-funnel with efficient magnetic stirring during 2 hours. The white precipitate was filtered, the filtrate was treated with 3x10 mL water in order to decompose the unreacted Grignard reagent and dissolve the magnesium chloride. The aqueous phase was removed and the organic phase was washed with 2 x 10 mL distilled water. The aqueous phase was discarded. After removing diethyl ether *in vacuo*, butyldiphenylphosphine was obtained as a colorless liquid (21.57 g, yield: 79%).

### Synthesis of butyl-*bis*(*m*-sulfonatophenyl)phosphane<sup>3</sup> (Bu-DPPDS)

Materials: freshly distilled 5.258g (21.72 mmol) butyldiphenylphosphane, 100 mL of oleum (20%), 50 mL (115.4 mmol) of triisooctylamine, 180 mL toluene. The product (7.14 g) was isolated as white powder. Yield: 73.6%. The purity was checked by <sup>31</sup>P-NMR.

<sup>1</sup>H-NMR (in D<sub>2</sub>O):  $\delta$  0.67 (t, 3H, CH<sub>3</sub>), 1.22 (m, 4H, 2 CH<sub>2</sub>), 2.03 (t, 2H, P-CH<sub>2</sub>), 7.3-7.45 (m, 4H), 7.60-7.75 (m, 2+2H). <sup>31</sup>P-NMR:  $\delta$  -15.26 (s). <sup>13</sup>C-NMR:  $\delta$  13.17 (s), 23.44 (d, J<sub>P-C</sub> = 13.8 Hz), 26.18 (d, J<sub>P-C</sub> = 7.8 Hz), 27.46 (d, J<sub>P-C</sub> = 14.2 Hz), 126.12 (s), 128.99 (d, J<sub>P-C</sub> = 10.11 Hz), 129.69 (d, J<sub>P-C</sub> = 3.7 Hz), 135.99 (d, J<sub>P-C</sub> = 16.55 Hz), 138.83 (d, J<sub>P-C</sub> = 11.0 Hz), 142.83 (d, J<sub>PC</sub> = 6.9 Hz).

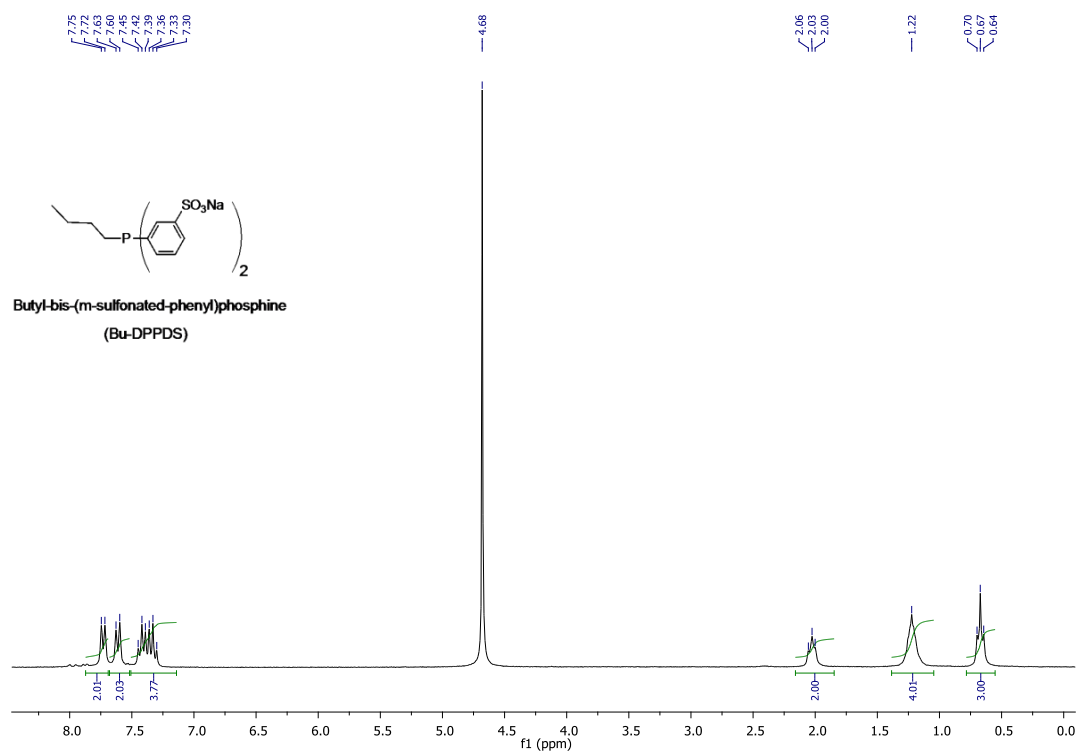

<sup>1</sup>H-NMR spectrum of the Bu-DPPDS

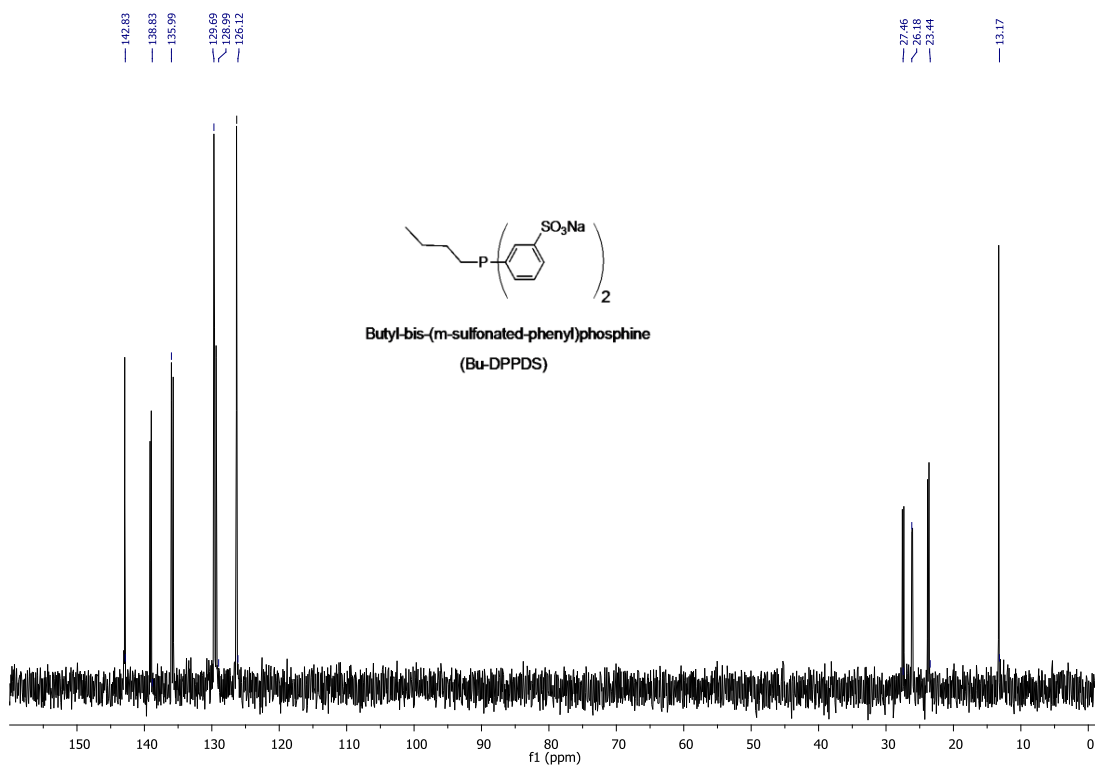

<sup>13</sup>C-NMR spectrum of Bu-DPPDS



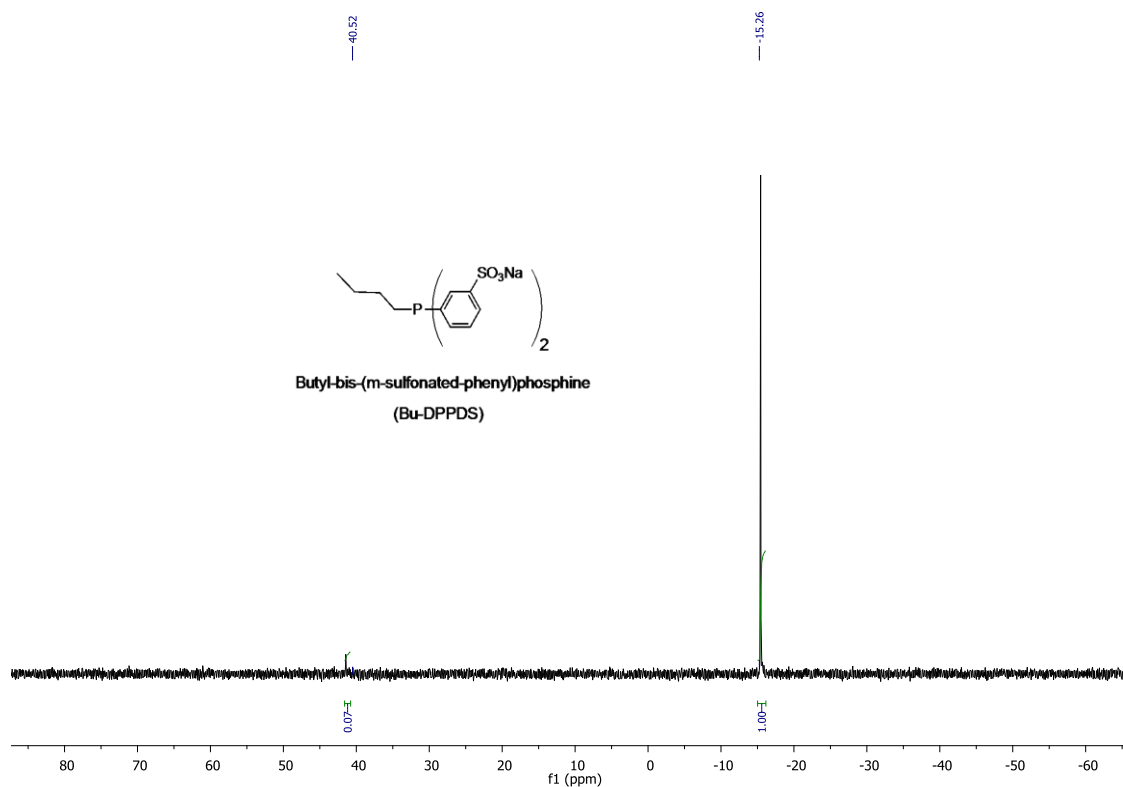

$^{31}\text{P}$ -NMR spectrum of Bu-DPPDS.

## References

1. B. Desai and O. C. Kappe, *J. Comb. Chem.*, 2005, **7**, 641.
2. <http://www.thalesnano.com/products/h-cube>
3. L.T. Míka, L. Orha, N. Farkas and I. T. Horváth, *Organometallics*, 2009, **28**, 1593.
